# Supplementary material for: The Role of Mitochondria in Brain Cell Protection from Ischaemia by Differently Prepared Propolis Extracts
Source: MDPI journal article supplement (doi:10.3390/antiox9121262), 2020-12-12
Supplement: s1 [file s1]

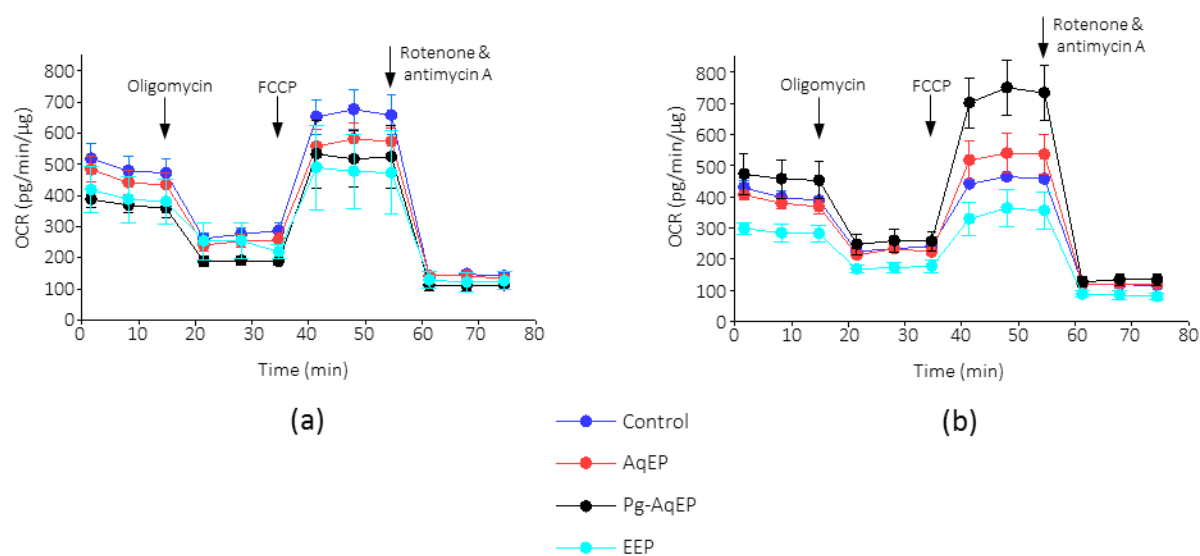

**Figure S2** Average values of mitochondrial oxygen consumption curves obtained by Seahorse XFp Analyser. (a) – cells were treated with 60 μg/ml of PC AqEP, or with Pg-AqEP, or 2 μg/ml of PC for EEP for 24 hours in normoxic conditions; (b) – after the same treatment in hypoxic conditions (2% oxygen). The data are presented as averages of 3 experiments ± standard deviation.
