# Supplementary material for: The Role of Mitochondria in Brain Cell Protection from Ischaemia by Differently Prepared Propolis Extracts
Source: MDPI journal article supplement (doi:10.3390/antiox9121262), 2020-12-12
Supplement: s1 [file s1]

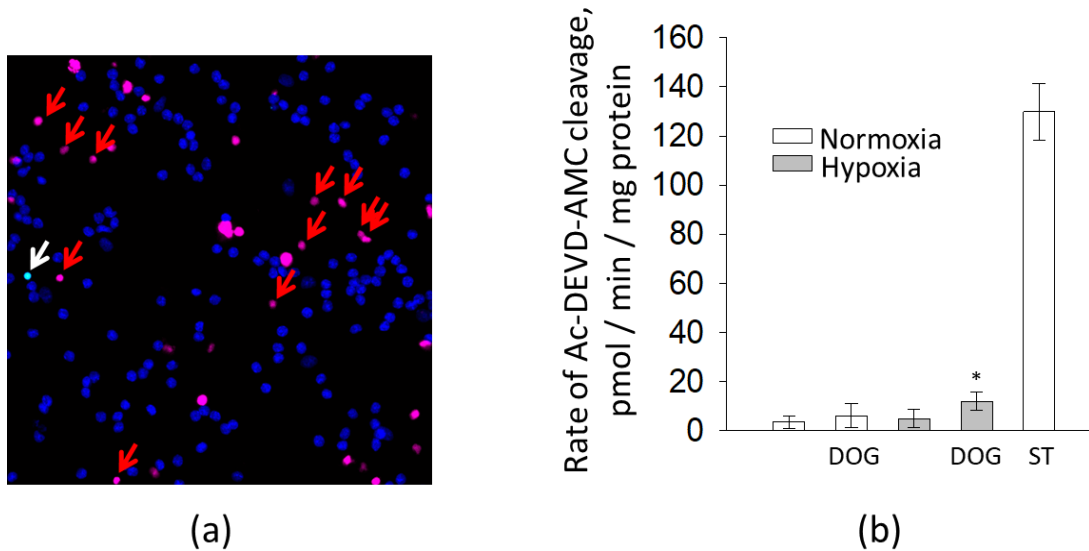

**Figure S1.** The effect of hypoxia and deoxyglucose (DOG) on number of chromatin-condensed nuclei (a) and caspase-3 activity level (b) in mixed neuronal-glial cultures. White arrow in (a) indicate a chromatin-condensed nucleus of a viable cell which is typical for apoptosis. Red arrows indicate condensed yet necrotic (propidium iodide-positive) nuclei. ST – 3 hour treatment with 100 nM staurosporine. \* - significant difference compared to normoxic control,  $p < 0.05$ .
